# Supplementary material for: MicroRNA-dependent localization of targeted mRNAs to mammalian P-bodies
Source: Springer Nature journal article supplement (doi:10.1038/ncb1274), 2005-06-05
Supplement: 41556_2005_BFncb1274_MOESM1_ESM.pdf [file 41556_2005_BFncb1274_MOESM1_ESM.pdf]

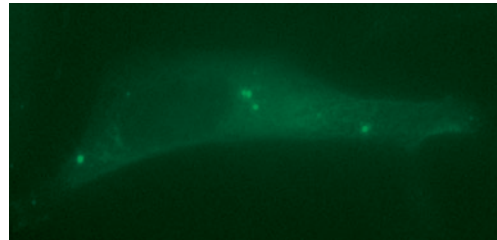

**myc-Ago2(H634A)**

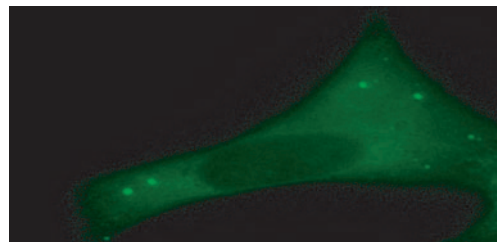

**myc-Ago2(D597A)**

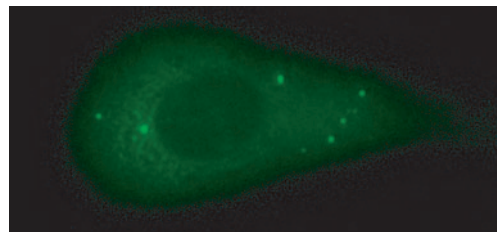

**myc-Ago2(D669A)**

**Figure S1** Localization of catalytically inactive Ago2 mutants. Catalytically inactive Ago2 mutants, H634A, D597A and D669A were expressed in U2-OS cells as myc-tagged proteins and localized in cells using FITC-conjugated anti-myc

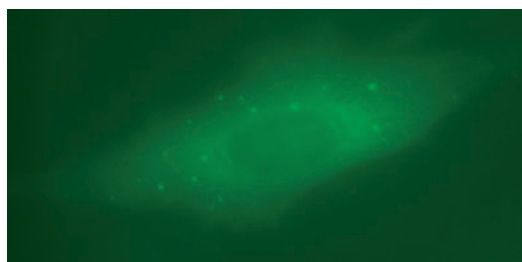

**myc-Ago1**

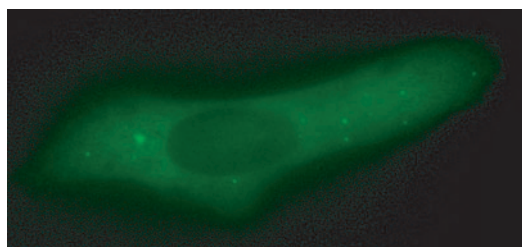

**myc-Ago3**

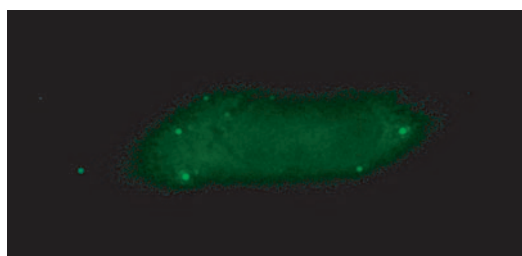

**myc-Ago4**

**Figure S2** Localization of catalytically inactive Argonaute subfamily proteins. Myc-tagged Ago1, Ago3 and Ago4 proteins were immunolocalized in human U2-OS cells using FITC-conjugated anti-myc antibodies.

**a**

mRNA reporter:

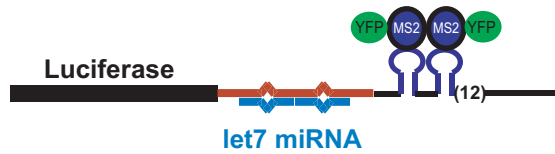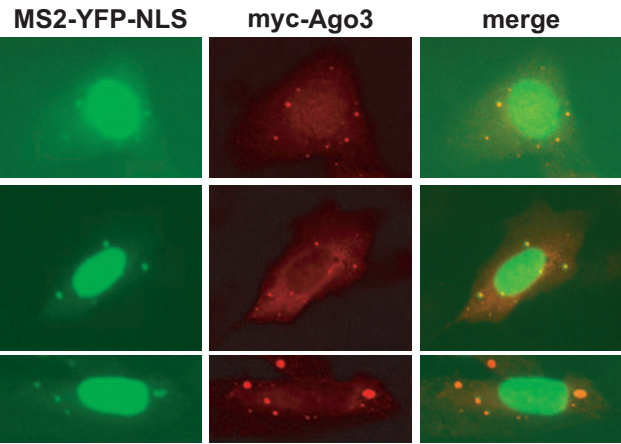

**b**

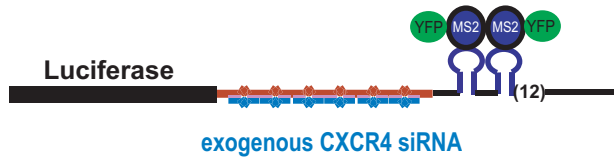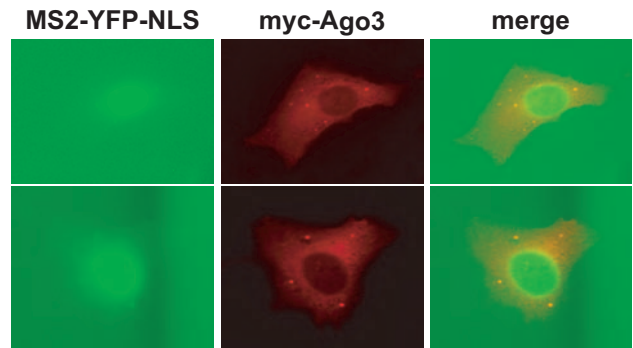

**Figure S3** Co-localization of Ago3 with miRNA targets. **(a)** The Luciferase-lin41 UTR fusion reporter was co-expressed in U2-OS cells with an MS2-YFP-NLS fusion protein and myc-Ago3. Reporter mRNA was visualized indirectly with YFP. Ago3 was localized using a Rhodamine Red conjugated anti-myc antibody. **(b)** The Luciferase-CXCR4 reporter was expressed in cells that were also transfected with the CXCR4 siRNA and a plasmid directing the expression of myc-Ago3. Analysis was as in **a**.
